# Supplementary material for: Triple-junction perovskite–perovskite–silicon solar cells with power conversion efficiency of 24.4%
Source: PubMed Central journal article supplement (PMC11036531; doi:10.1039/d3ee03687a), 2024-02-13
Supplement: EE-017-D3EE03687A-s001.pdf [file EE-017-D3EE03687A-s001.pdf]

## Electronic Supplementary Information

### **Triple-junction perovskite–perovskite–silicon solar cells with power conversion efficiency of 24.4%**

Hang Hu,<sup>ab</sup> Sophie X. An,<sup>b</sup> Yang Li,<sup>ab</sup> Seyedamir Orooji,<sup>ab</sup> Roja Singh,<sup>ab</sup> Fabian Schackmar,<sup>ab</sup> Felix Laufer,<sup>ab</sup> Qihao Jin,<sup>b</sup> Thomas Feeney,<sup>ab</sup> Alexander Diercks,<sup>b</sup> Fabrizio Gota,<sup>ab</sup> Somayeh Moghadamzadeh,<sup>ab</sup> Ting Pan,<sup>ab</sup> Michael Rienäcker,<sup>c</sup> Robby Peibst,<sup>cd</sup> Bahram Abdollahi Nejad<sup>\*ab</sup> and Ulrich W. Paetzold<sup>\*ab</sup>

<sup>a</sup> Institute of Microstructure Technology (IMT), Karlsruhe Institute of Technology (KIT),  
Hermann-von-Helmholtz-Platz 1, 76344 Eggenstein-Leopoldshafen, Germany

<sup>b</sup> Light Technology Institute (LTI), Karlsruhe Institute of Technology (KIT), Engesserstrasse 13,  
76131 Karlsruhe, Germany

<sup>c</sup> Institute for Solar Energy Research Hamelin (ISFH), Am Ohrberg 1, 31860, Emmerthal,  
Germany

<sup>d</sup> Institute of Electronic Materials and Devices, Leibniz Universität Hannover, Schneiderberg 32,  
30167, Hannover, Germany

\* Corresponding authors: bahram.abdollahi@kit.edu; ulrich.paetzold@kit.edu

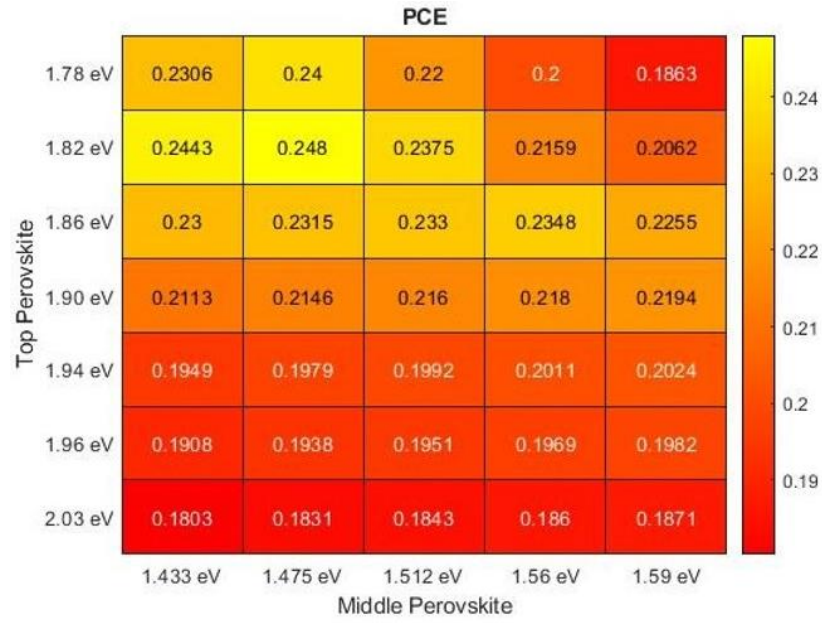

**Fig. S1** Heatmap of simulated PCEs of perovskite–perovskite–Si MTJSCs for varied bandgap combinations of top and middle perovskites.

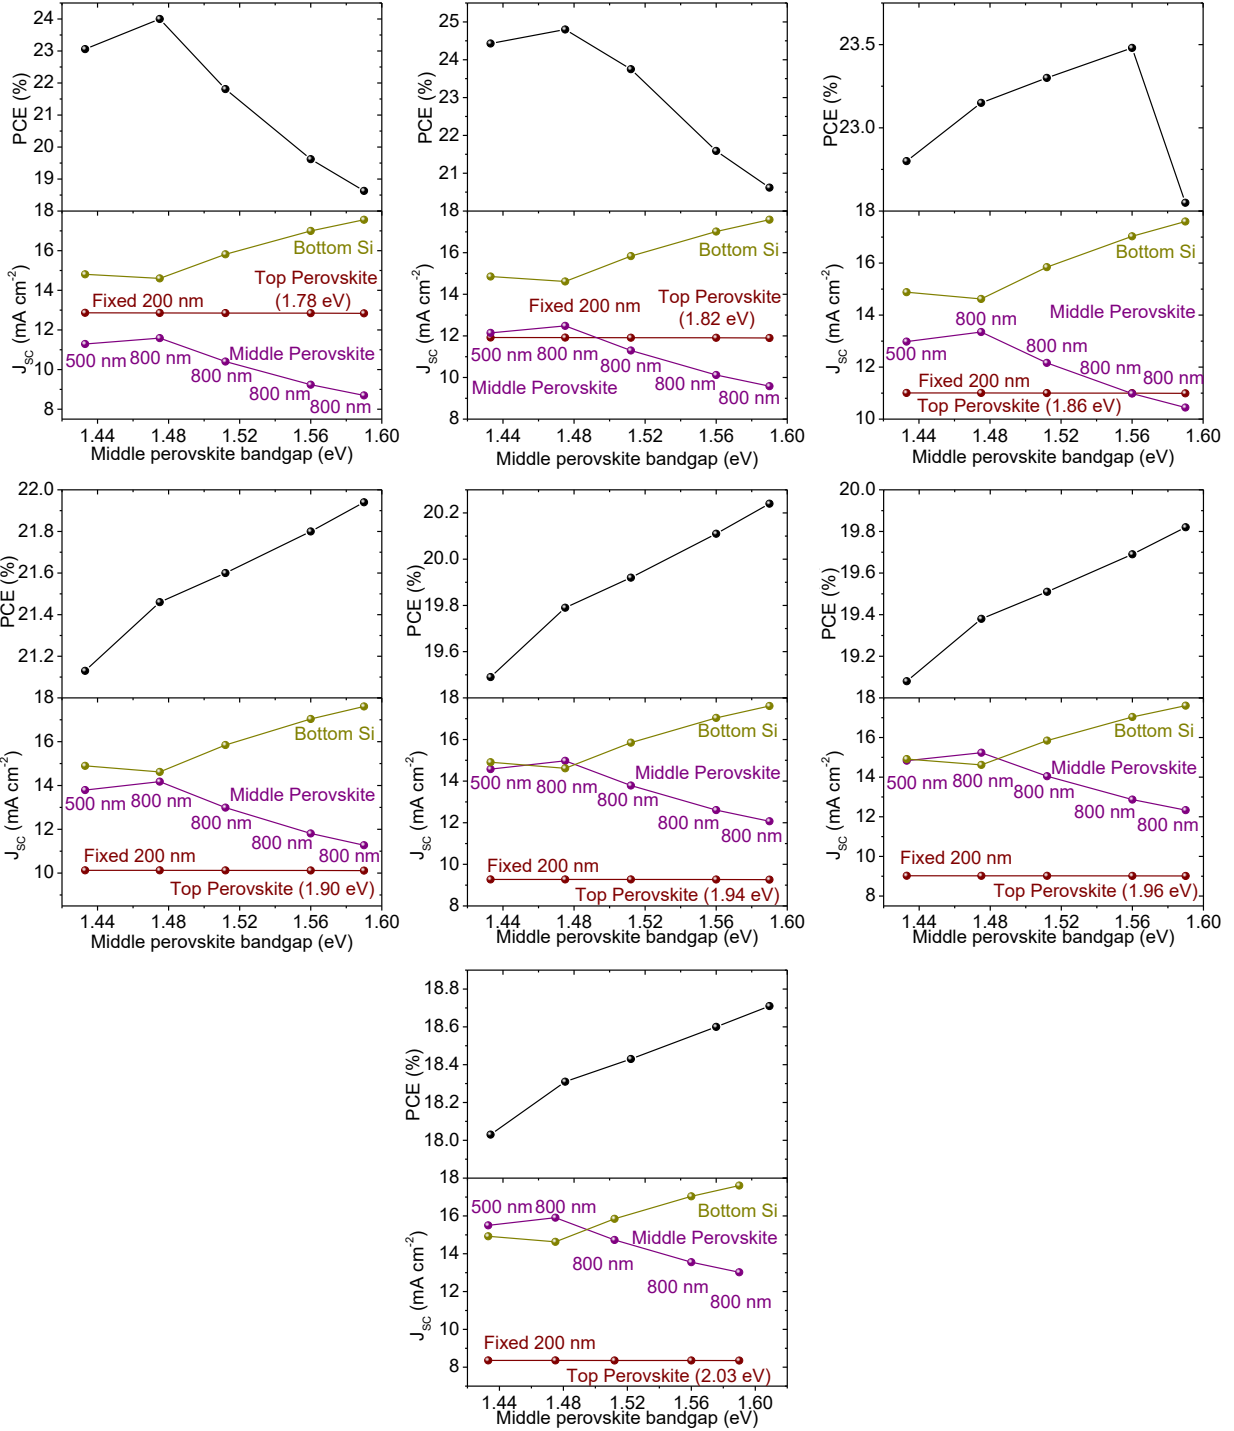

**Fig. S2** Simulated data of PCE and  $J_{sc}$  of perovskite–perovskite–Si MTJSCs for varied bandgap combinations of top and middle perovskites. The thickness of top perovskite is fixed to 200 nm.

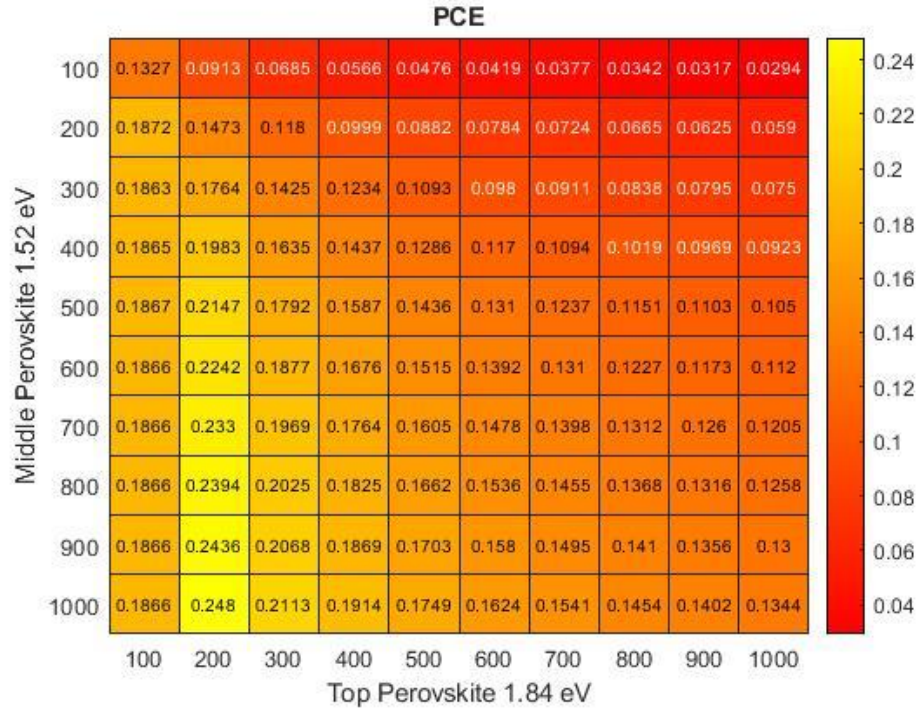

**Fig. S3** Heatmap of simulated PCEs of perovskite–perovskite–Si MTJSCs for varied thickness of top (1.84 eV) and middle (1.52 eV) perovskites.

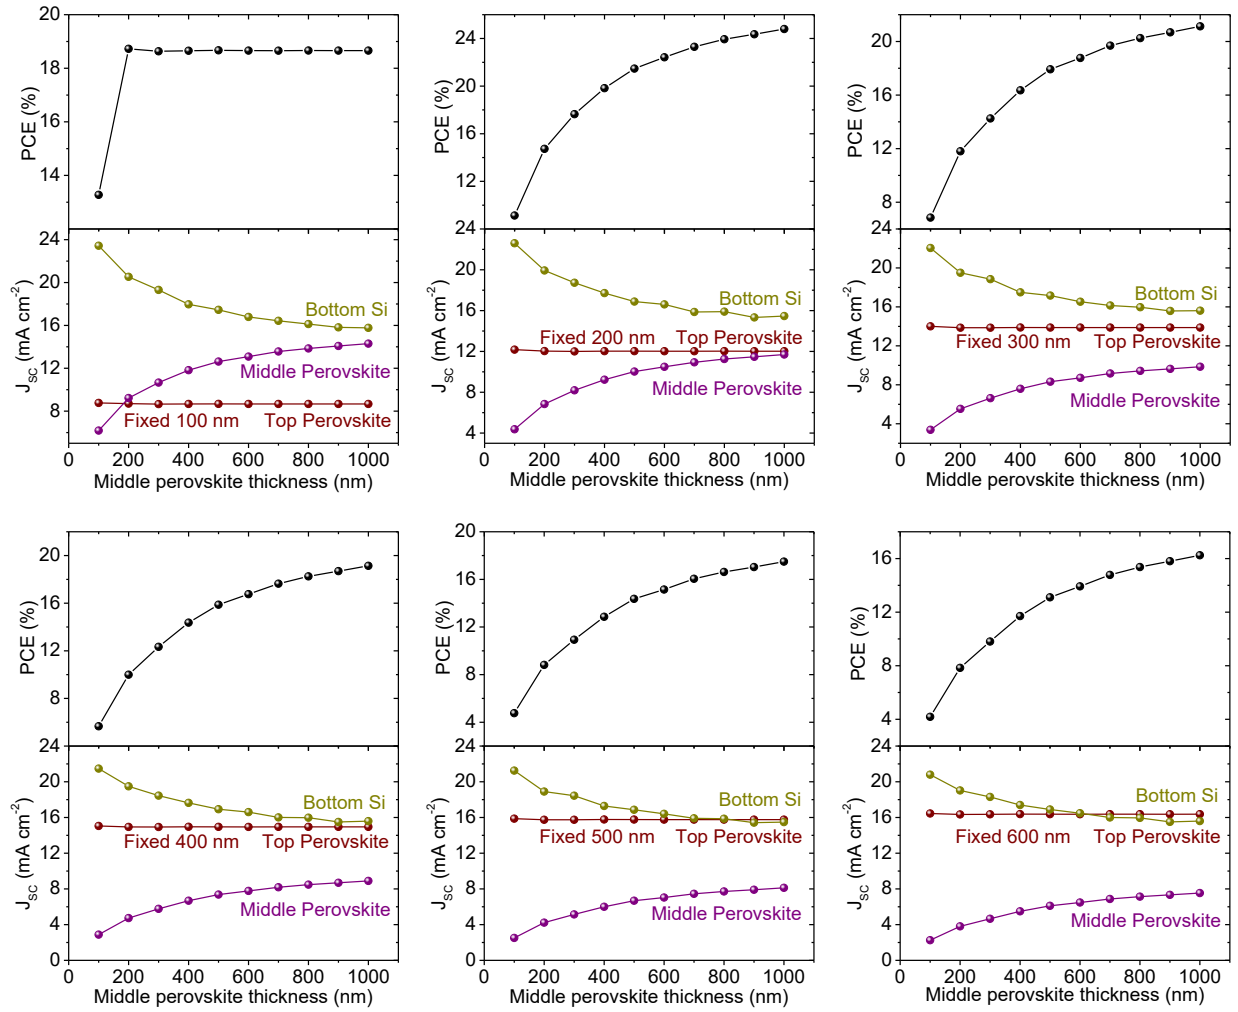

**Fig. S4** Simulated data of PCE and  $J_{sc}$  of perovskite–perovskite–Si MTJSCs for varied thickness of top (1.84 eV) and middle (1.52 eV) perovskites.

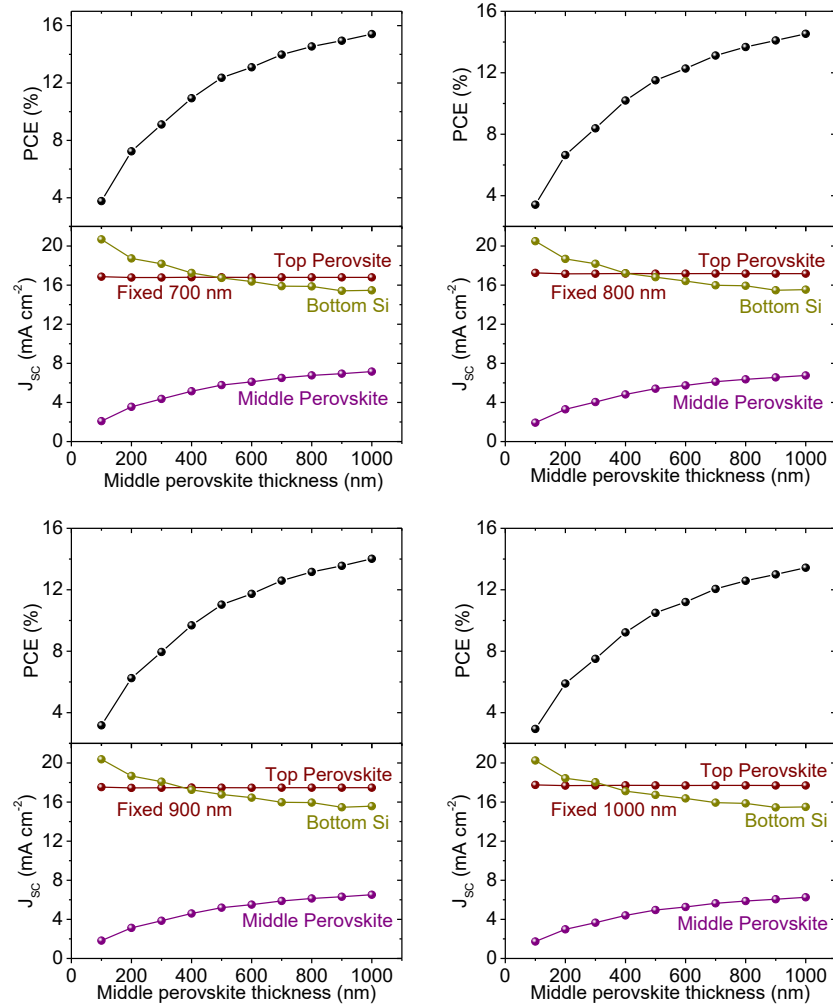

**Fig. S5** Simulated data of PCE and  $J_{sc}$  of perovskite–perovskite–Si MTJSCs for varied thickness of top (1.84 eV) and middle (1.52 eV) perovskites.

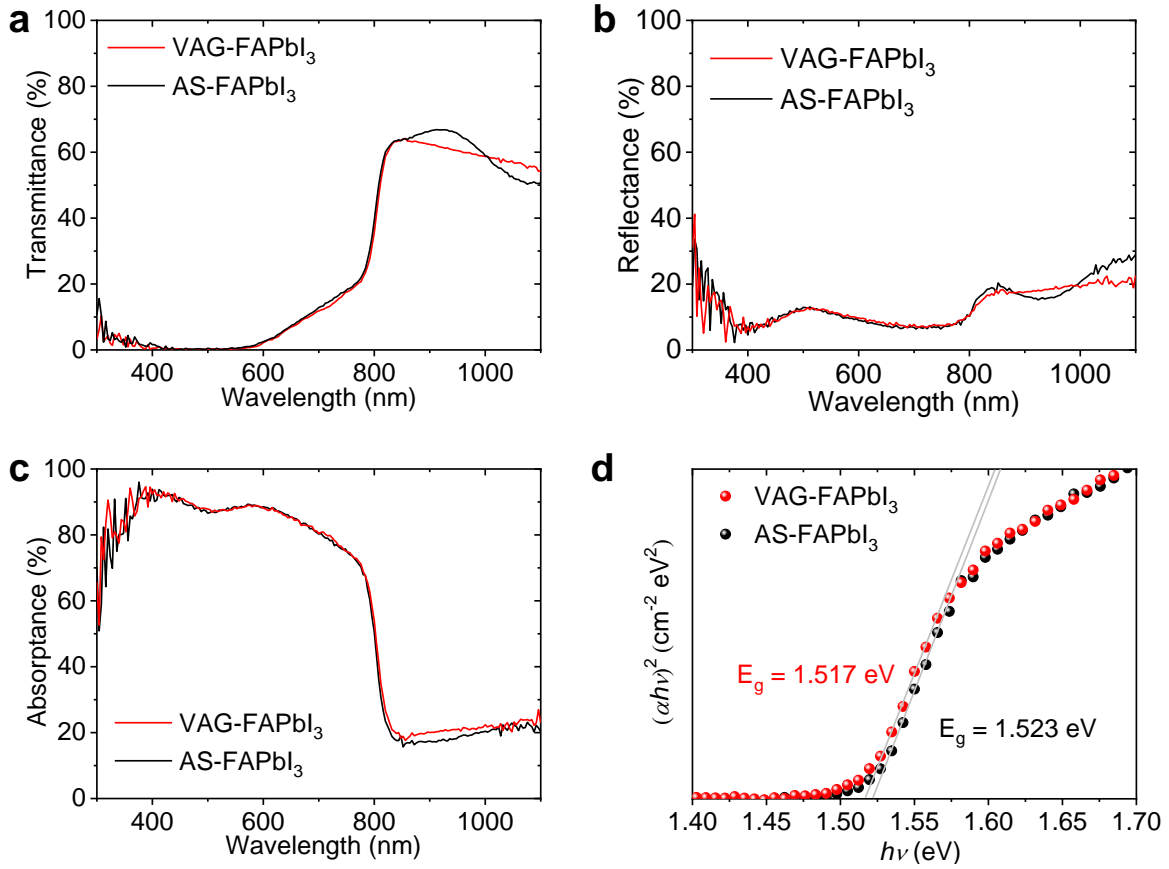

**Fig. S6** (a) Transmittance, (b) reflectance, (c) absorbance spectra, and (d) Tauc-plots for FAPbI<sub>3</sub> perovskite thin films fabricated by AS and VAG methods.

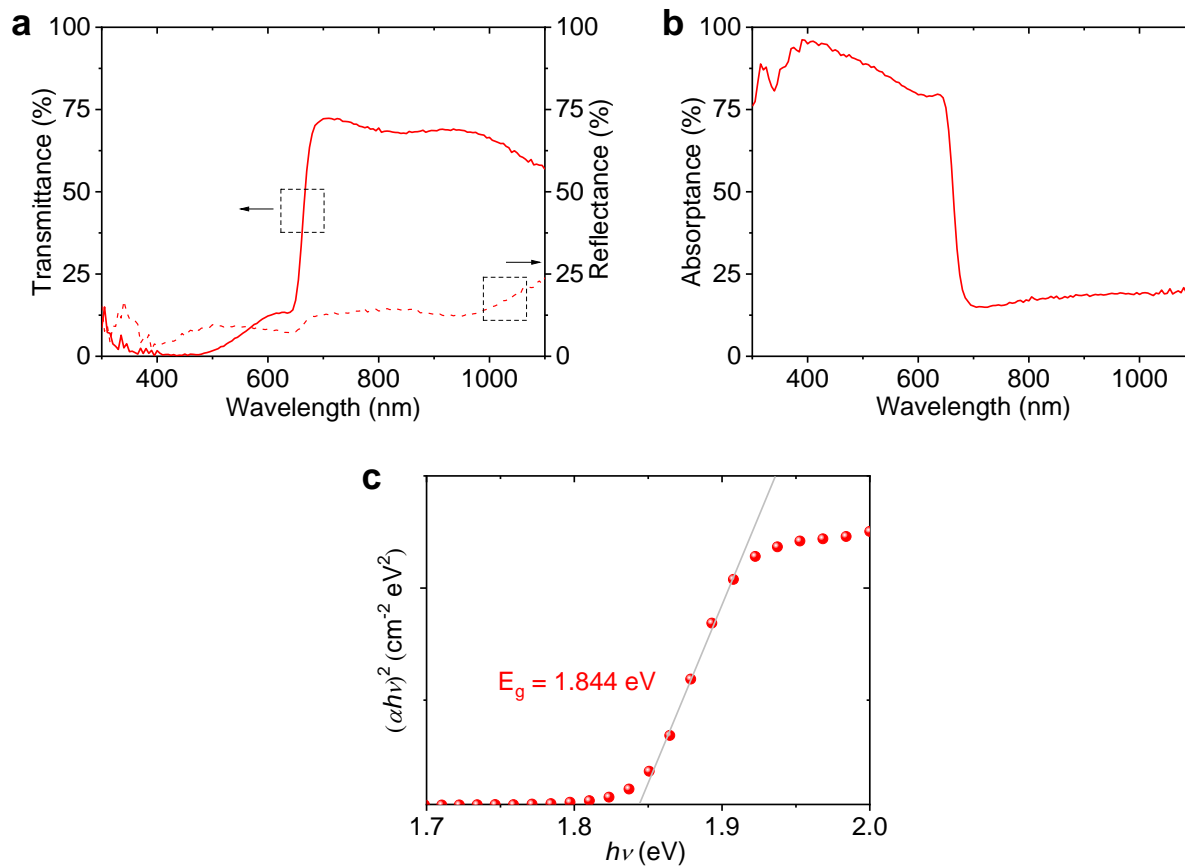

**Fig. S7** (a) Transmittance, reflectance, (b) absorbance spectra, and (c) Tauc-plots for WBG perovskite thin film fabricated by AS method.



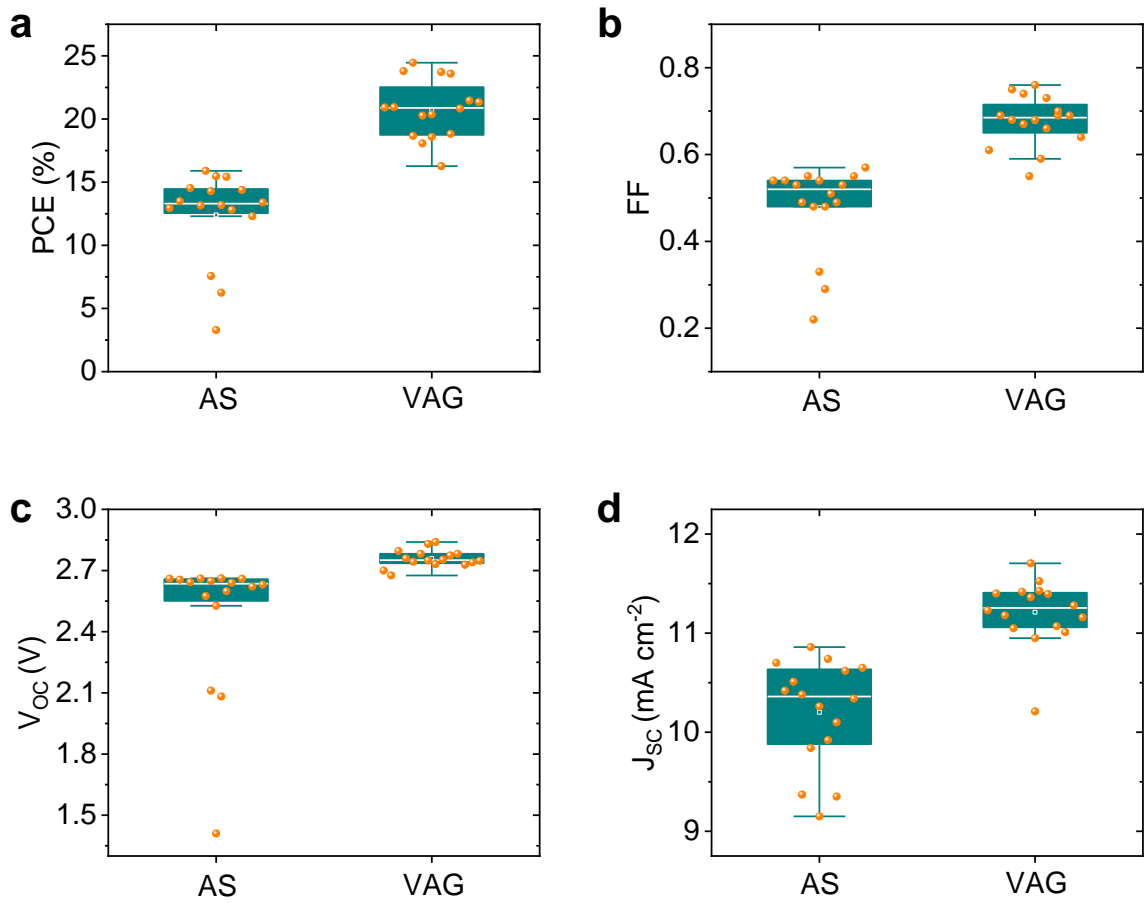

**Fig. S8** Statistical distribution of the photovoltaic parameters for perovskite-perovskite-Si MTJSCs. (a) power conversion efficiencies (PCE), (b) fill factor (FF), (c) open-circuit voltage ( $V_{oc}$ ), and (d) short-circuit current density ( $J_{sc}$ ). The MBG FAPbI<sub>3</sub> thin films of middle cells were fabricated by AS and VAG methods.

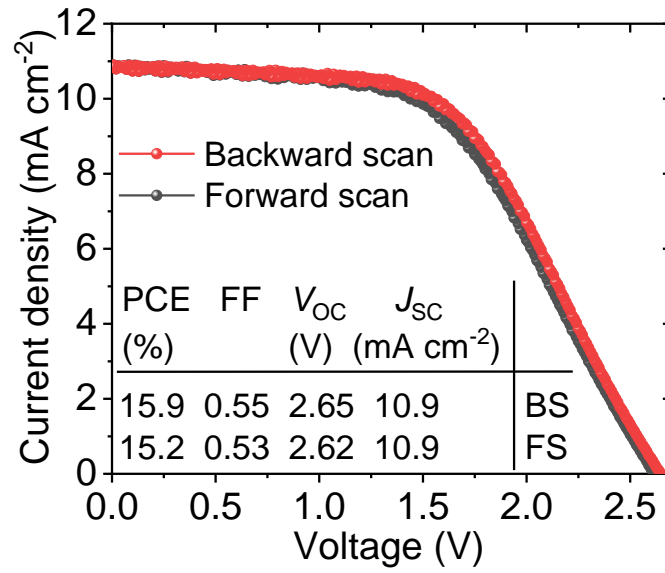

**Fig. S9**  $J$ - $V$  characteristics for the champion perovskite-perovskite-Si MTJSC based on AS method for processing of MBG  $\text{FAPbI}_3$  perovskite thin film.

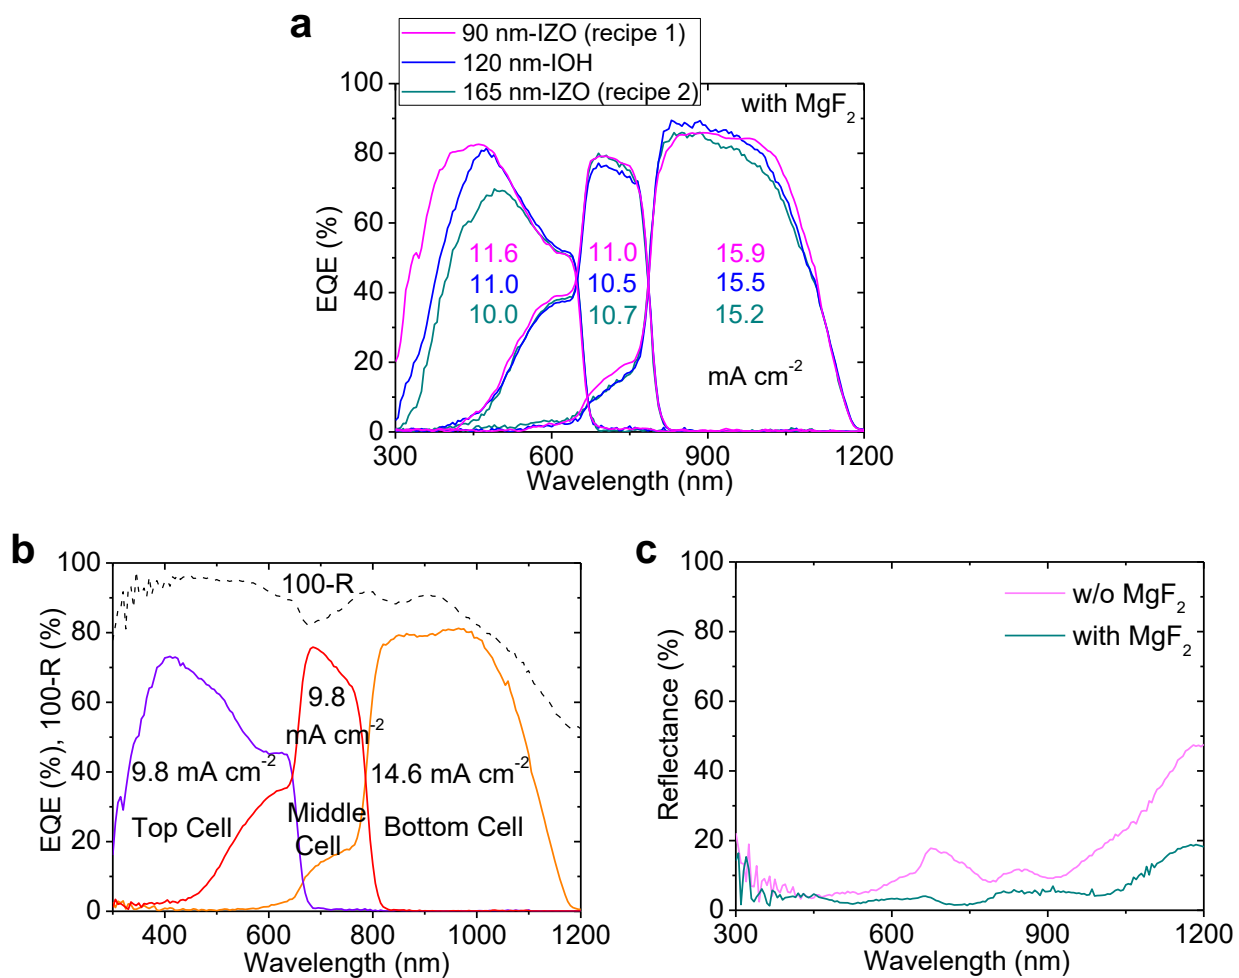

**Fig. S10** EQE and reflectance spectra for the MTJSC combined with perovskite bandgaps of 1.84 eV and 1.52 eV. (a) Using different TCO layers (recipe 1: 90 nm IZO with a low deposition pressure of 0.8 mTorr and a high power supply of 200 W; recipe 2: 165 nm IZO with a high deposition pressure of 1.5 mTorr and a low power supply of 100 W; 120 nm IOH). (b) EQE spectra of the champion MTJSC without MgF<sub>2</sub> antireflection coating. (c) Comparison of reflectance for the champion MTJSC with and without MgF<sub>2</sub> antireflection coating.

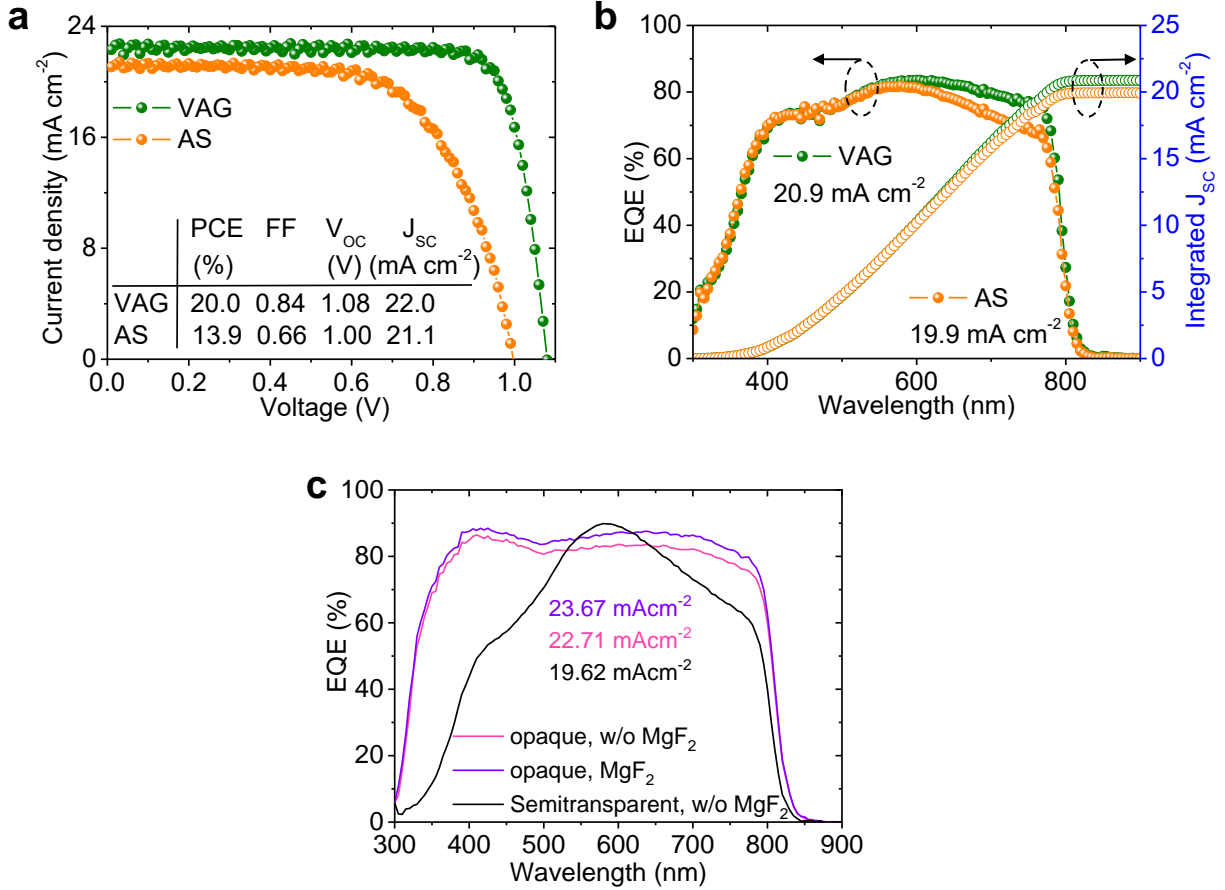

**Fig. S11** PV performance of single-junction middle sub-cells. (a)  $J$ - $V$  characteristics from backward scan and (b) EQE spectra for semitransparent devices fabricated using VAG and AS methods. (c) EQE spectra for semitransparent and opaque devices fabricated using VAG method. The semitransparent device was applied recipe 2 for TCO deposition: 165 nm IZO with a high deposition pressure of 1.5 mTorr and a low power supply of 100 W.

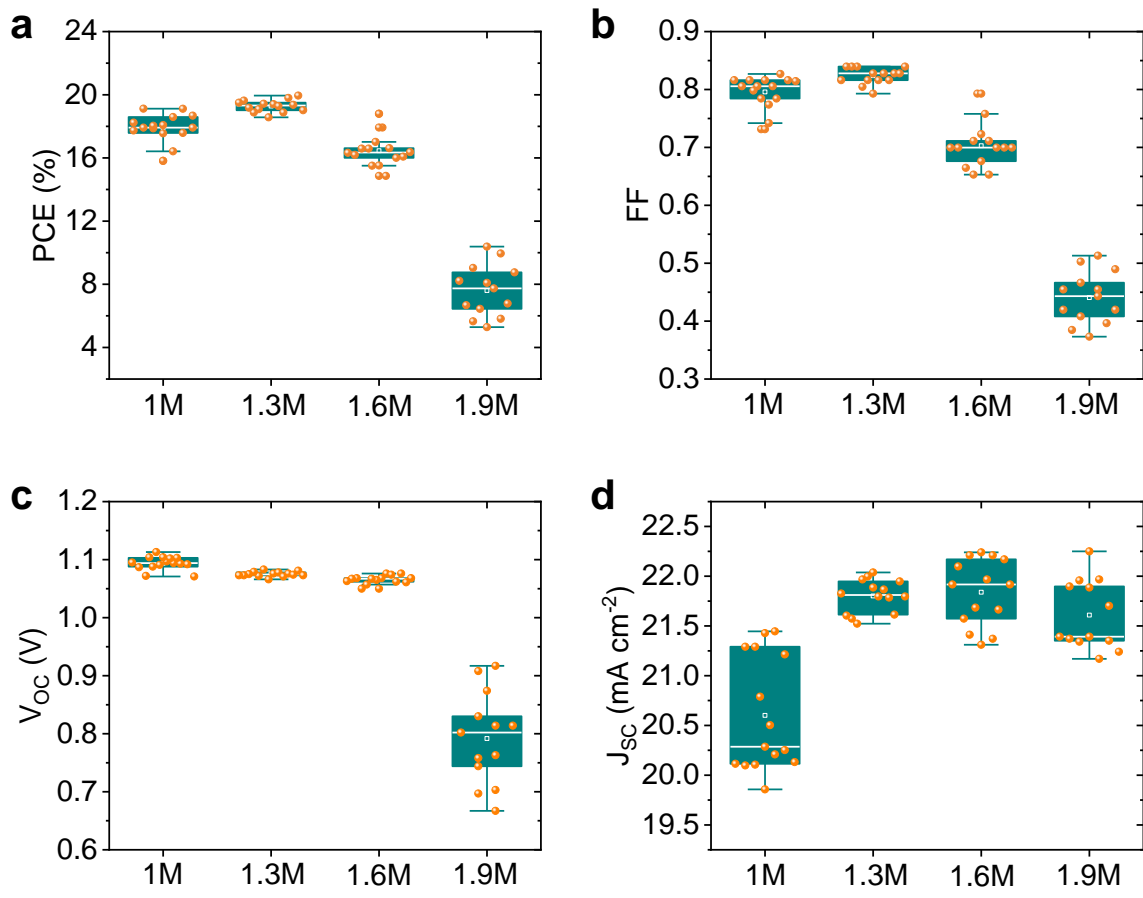

**Fig. S12** Statistical distribution of the photovoltaic parameters for semitransparent single-junction middle perovskite solar cells. (a) PCE, (b) FF, (c)  $V_{oc}$ , and (d)  $J_{sc}$ . The FAPbI<sub>3</sub> thin films were fabricated by VAG method with a variation of perovskite precursor concentration from 1.0 to 1.9 M.

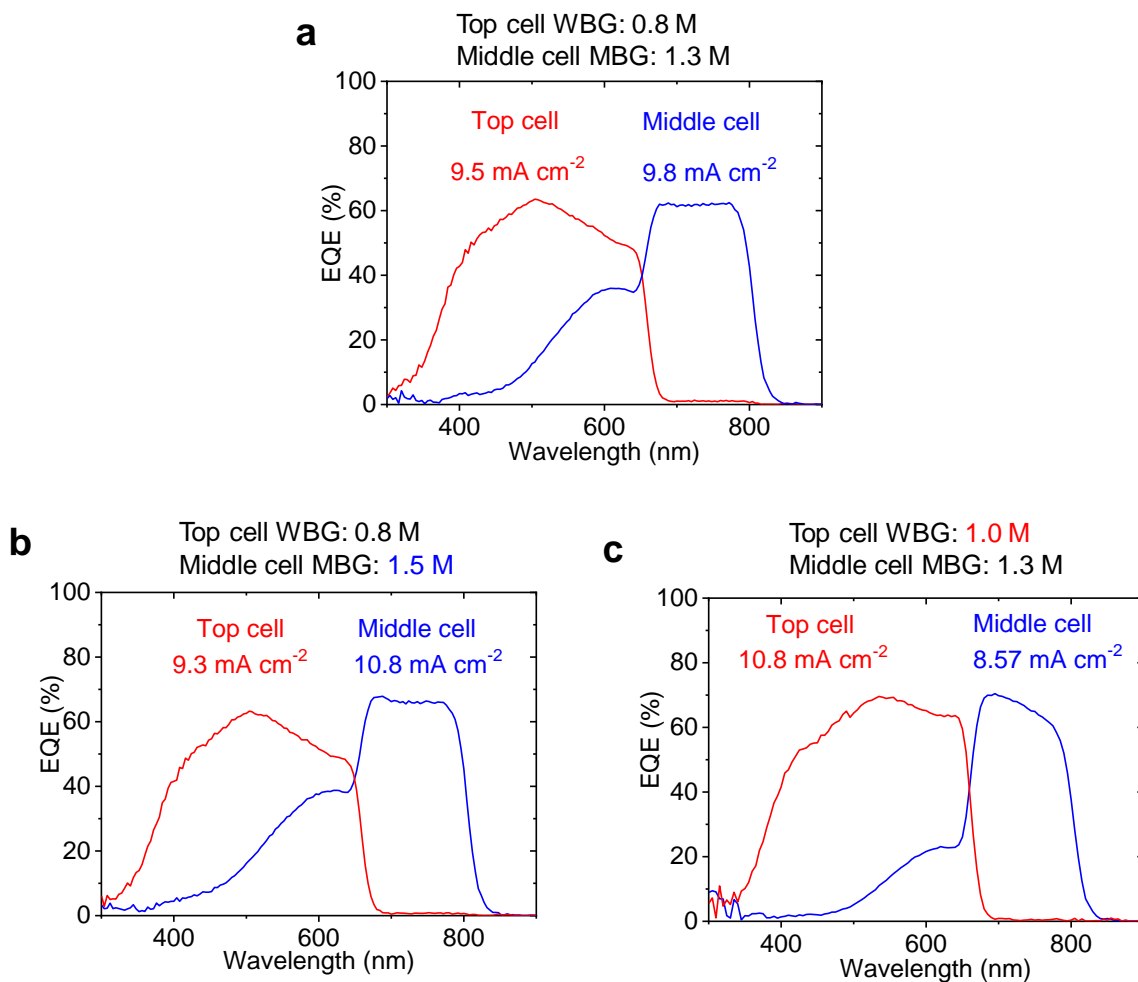

**Fig. S13** EQE spectra for the MTJSCs. The WBG was fabricated by AS method with a variation of perovskite precursor concentration of 0.8 or 1.0 M. The MBG was fabricated by VAG method with a variation of perovskite precursor concentration of 1.3 or 1.5 M. TCO deposition was applied to recipe 2: 165 nm IZO with a high deposition pressure of 1.5 mTorr and a low power supply of 100 W.

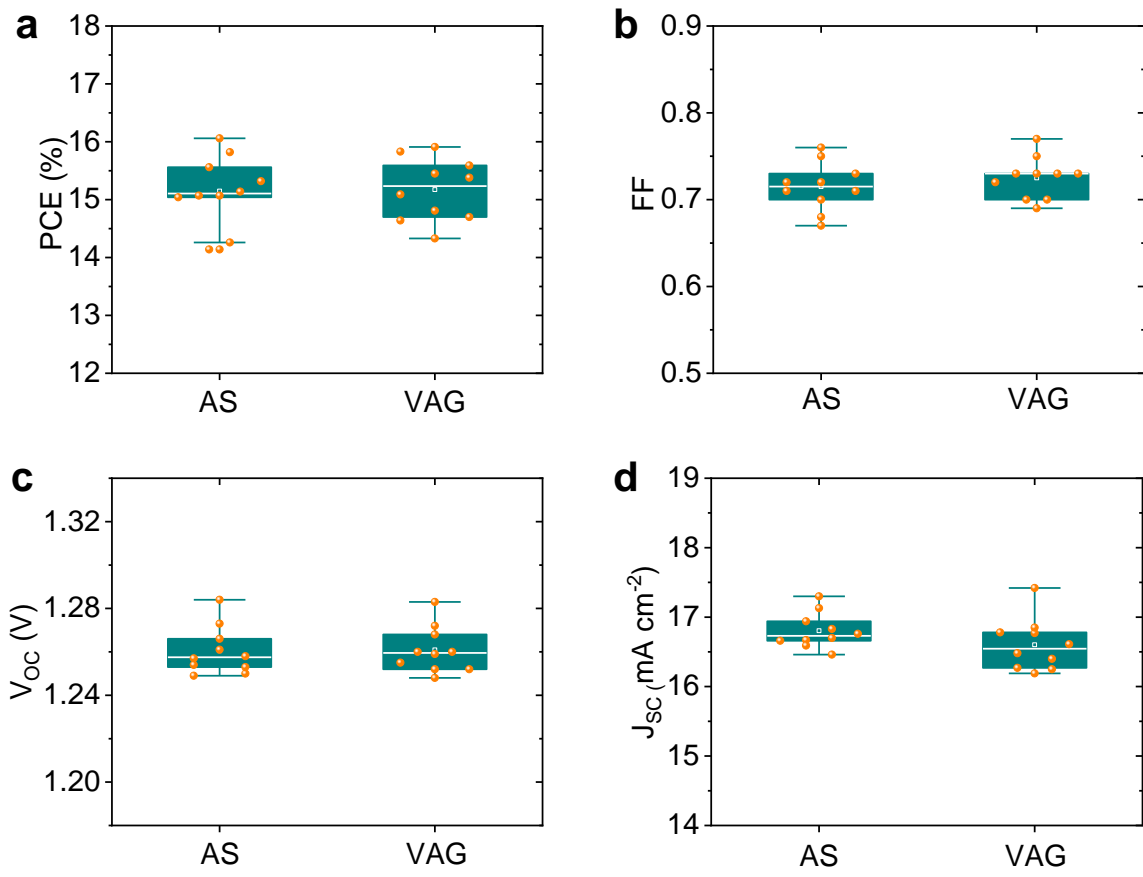

**Fig. S14** Statistical distribution of the photovoltaic parameters for semitransparent single-junction top perovskite solar cells. (a) PCE, (b) FF, (c)  $V_{oc}$ , and (d)  $J_{sc}$ . The WBG thin films were fabricated by VAG or AS methods with a perovskite precursor concentration of 0.8 M.

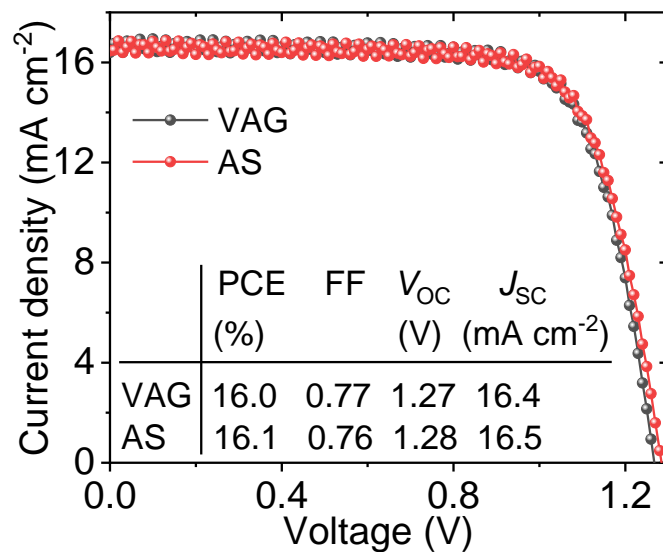

**Fig. S15**  $J$ - $V$  characteristics from the backward scan for the champion semitransparent single-junction top perovskite solar cells. The WBG perovskite thin films were fabricated by using VAG or AS methods.



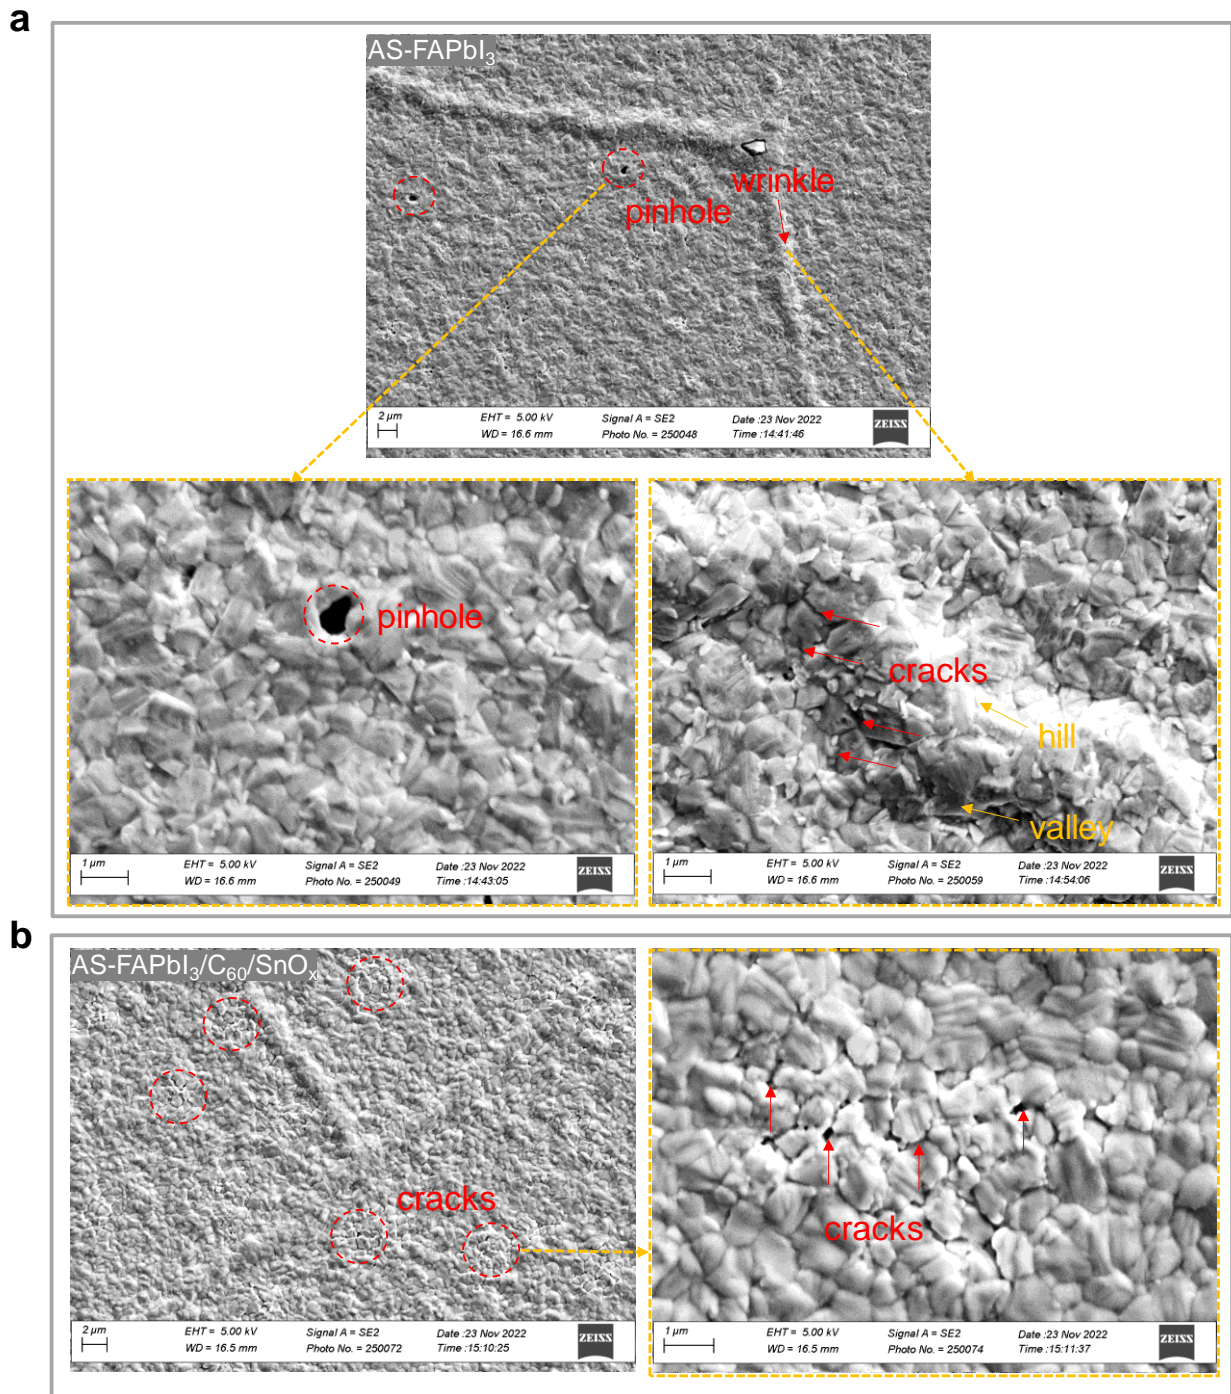

**Fig. S16** Top-view SEM images of FAPbI<sub>3</sub> thin films fabricated AS methods and sequential deposition of C<sub>60</sub> and SnO<sub>x</sub> layers. (a) AS-FAPbI<sub>3</sub>. (b) AS-FAPbI<sub>3</sub>/C<sub>60</sub>/SnO<sub>x</sub>.

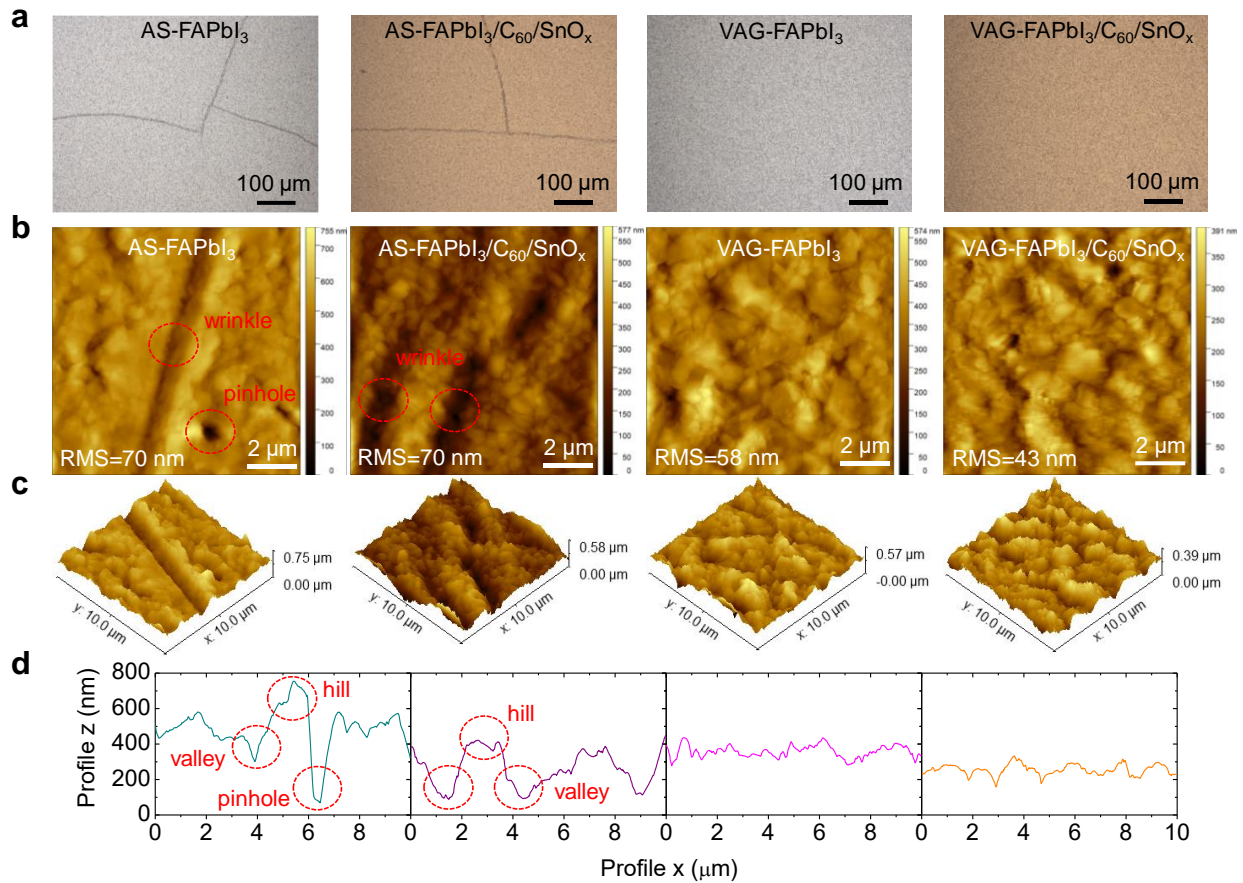

**Fig. S17** The morphology of different perovskite and sequential deposition of  $C_{60}$  and  $SnO_x$  layers. (a) Optical microscopic, (b) top-view, (c) 3D AFM images, and (d) the profile of FAPbI<sub>3</sub> thin films (fabricated by VAG and AS methods) and sequential deposition of  $C_{60}$  and  $SnO_x$  layers. The pinholes observed in AS-FAPbI<sub>3</sub> thin film have a high depth of  $> 650$  nm that is comparable with the overall perovskite thin film thickness, which causes shunting in the solar cell as well as triple-junction architecture. The pinholes and cracks allow for a faster penetration of the solvents of the WBG perovskite top cell ink.

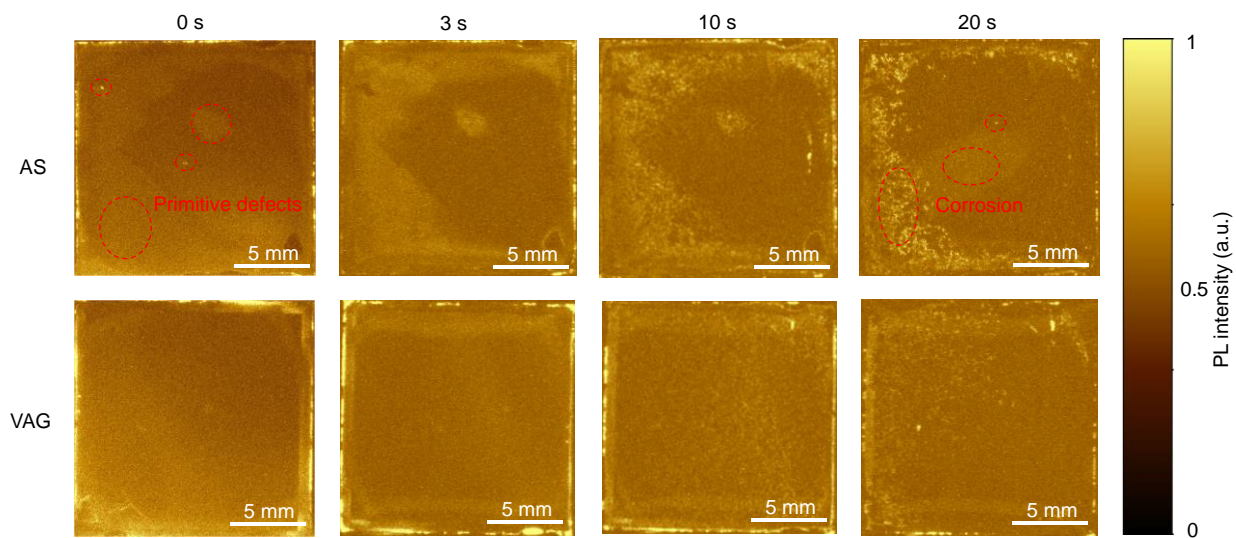

**Fig. S18** PL imaging evolution *vs.* time for ITO/NiO<sub>x</sub>/2PACz/FAPbI<sub>3</sub>/C<sub>60</sub>/SnO<sub>x</sub> stack (FAPbI<sub>3</sub> thin films fabricated by VAG and AS methods). After dropping DMF on the stack, the PL images are taken at different times between 0 s and 20 s.

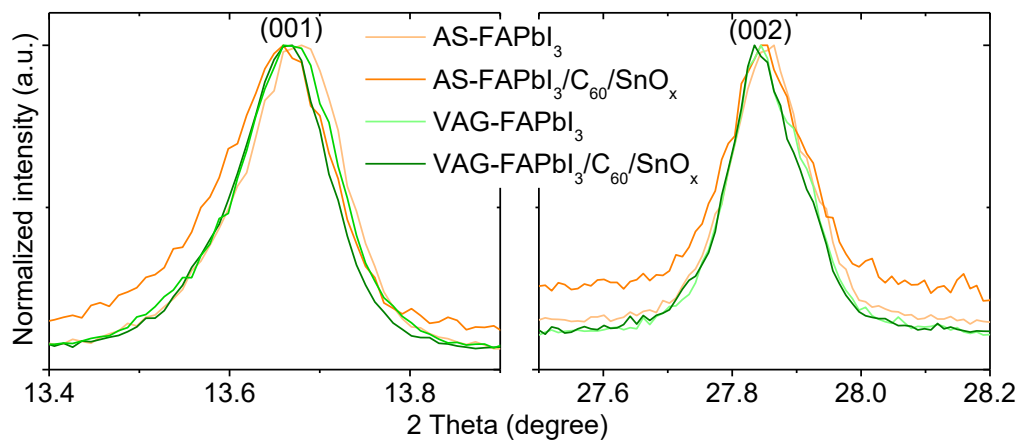

**Fig. S19** Normalized intensity of XRD patterns for FAPbI<sub>3</sub> thin films (fabricated by VAG and AS methods) and sequential deposition of C<sub>60</sub> and SnO<sub>x</sub> layers.

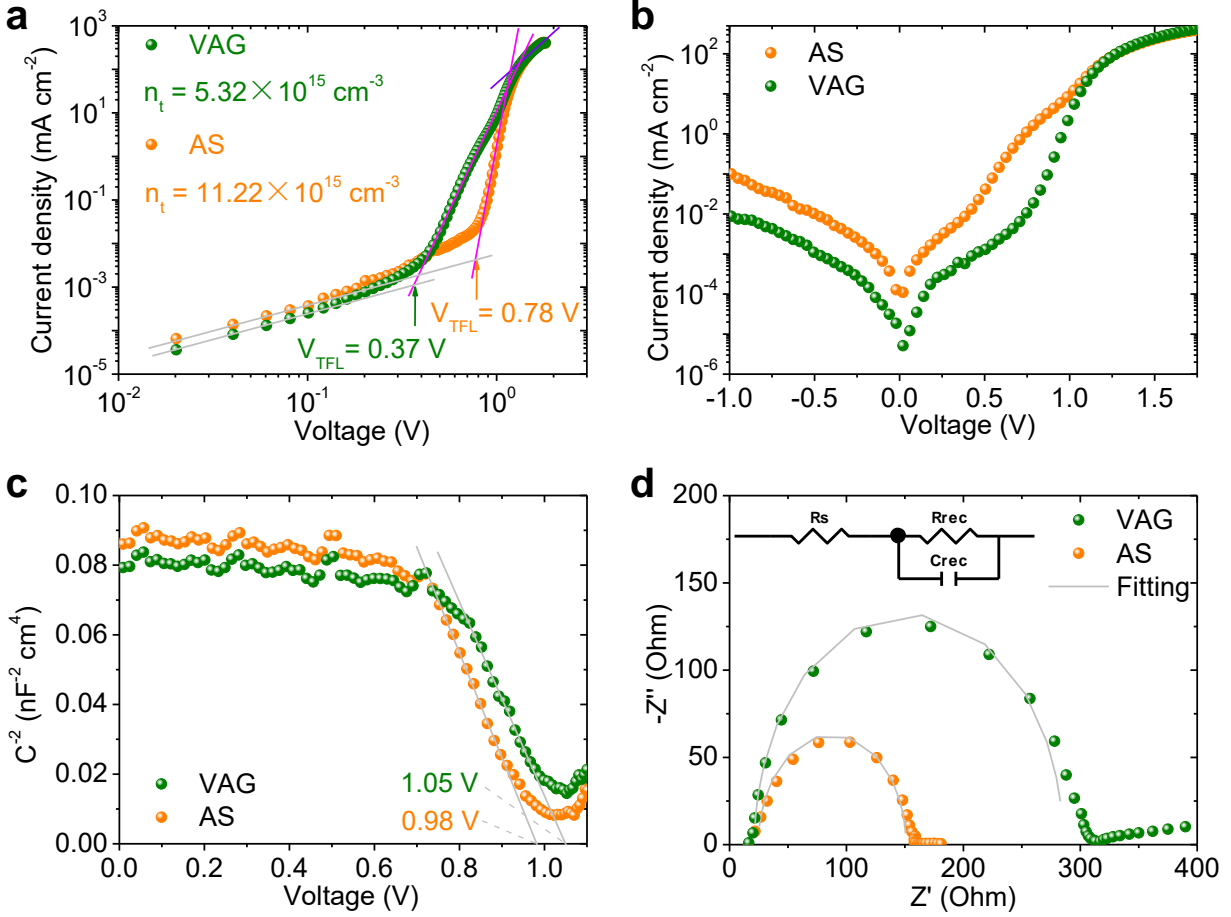

**Fig. S20** Characteristics of non-radiative recombination for semitransparent middle sub-cell. (a) SCLC analyses, (b) dark  $J$ - $V$  characteristics, (c) Mott-Schottky plots, and (d) Nyquist plots. The inset in (d) is the equivalent circuit diagram. In the low-frequency region of (d), the straight-like transmission line is related to neglected charge carrier diffusion, which is not considered for fitting.<sup>1</sup>

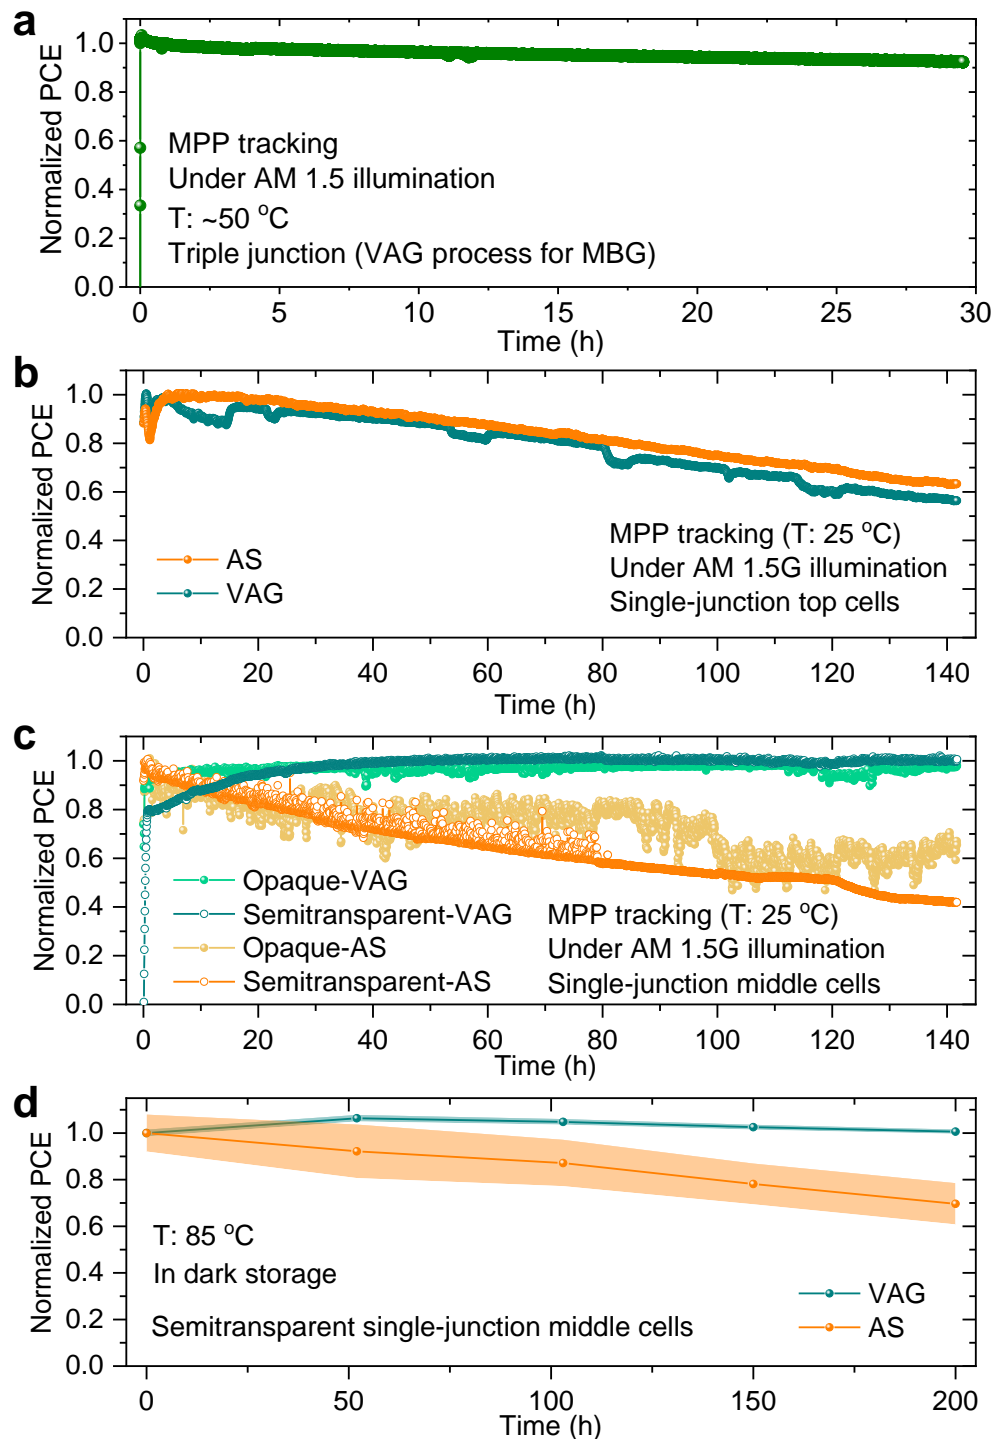

**Fig. S21** Evolution of normalized PCEs. (a) perovskite–perovskite–Si MTJSC (MBG was fabricated by VAG strategy) under continuous AM 1.5G illumination at ~50 °C for MPP tracking. (b) Single-junction top cells and (c) middle cells (semitransparent and opaque architectures) under continuous AM 1.5G illumination at 25 °C for MPP tracking. (d) Semitransparent middle cells in dark storage at 85 °C. All devices without encapsulation were tested in a N<sub>2</sub>-filled glovebox.

**Table S1** Summary of different parameters for TRPL measurements.

| Samples                                                               | $\tau_1$ (ns) | Fraction 1 | $\tau_2$ (ns) | Fraction 2 | $t_{\text{avg}}$ (ns) |
|-----------------------------------------------------------------------|---------------|------------|---------------|------------|-----------------------|
| ITO/2PACz/FAPbI <sub>3</sub> (VAG)                                    | -             | -          | -             | -          | 3581                  |
| ITO/2PACz/FAPbI <sub>3</sub> (AS)                                     | -             | -          | -             | -          | 3313                  |
| ITO/2PACz/FAPbI <sub>3</sub> /C <sub>60</sub> /SnO <sub>x</sub> (VAG) | 4             | 0.582      | 27            | 0.418      | 14                    |
| ITO/2PACz/FAPbI <sub>3</sub> /C <sub>60</sub> /SnO <sub>x</sub> (AS)  | 3             | 0.629      | 16            | 0.371      | 8                     |

The TRPL data for ITO/2PACz/FAPbI<sub>3</sub> stack was fitted with a mono-exponential equation:  $Y = A \exp(-t/\tau)$ , and the data of ITO/2PACz/FAPbI<sub>3</sub>/C<sub>60</sub>/SnO<sub>x</sub> stack was fitted with a biexponential equation:  $Y = A_1 \exp(-t/\tau_1) + A_2 \exp(-t/\tau_2)$ .  $\tau_1$  and  $\tau_2$  reveal a fast lifetime and a slow lifetime, respectively.

**Table S2** Summary of different parameters for EIS measurements for FAPbI<sub>3</sub>-based semitransparent single-junction solar cells.

| Samples | $R_s$ ( $\Omega$ ) | $R_{rec}$ ( $\Omega$ ) | $C_{rec}$ (nF) |
|---------|--------------------|------------------------|----------------|
| AS      | 24.7               | 126.2                  | 0.1            |
| VAG     | 21.3               | 264.0                  | 0.1            |

$R_s$ : series resistance;  $R_{rec}$ : charge recombination resistance;  $C_{rec}$ : charge recombination capacitance. All data were fitted by Z-View.



## References

- 1 H. Hu, D. B. Ritzer, A. Diercks, Y. Li, R. Singh, P. Fassel, Q. Jin, F. Schackmar, U. W. Paetzold and B. Abdollahi Nejand, *Joule*, 2023, **7**, 1–19.
